# Supplementary material for: A standardised framework to identify optimal animal models for efficacy assessment in drug development
Source: PLoS One. 2019 Jun 13;14(6):e0218014. doi: 10.1371/journal.pone.0218014 (PMC6563989; doi:10.1371/journal.pone.0218014)
Supplement: S6 Supporting Information — (XLSX) [file pone.0218014.s006.xlsx]

## Sheet: Introduction
Individual Publication Assessment
Publications with experiments on two models were counted separately for each model while studies with more than one arm of an included drug were counted only once. We used a shortened list of reporting quality parameters according to the ARRIVE guidelines: instead of specifically assessing whether the animals were randomised into the treatment groups, the randomisation method was mentioned, and c…

## Sheet: Glossary
Nb	Number
M	Male
F	Female
B	Both
Ctrl	Control
GBH	Genetic, Biochemical and Histological
F	Functional
Y	Yes
N	No
P	Partially
U	Unclear

## Sheet: QA
			Quality Assessment									Outcomes			In line
	Reference	Model	Housing	Husbandry	Sample Size	Sample Size Calculation	Blinding	Randomisation	Acclimatisation	Sex Disclosed	M, F or M/F	BHP	F	Category	Y/N/P	Background Ctrl	Background Model
	Colesevelam
	Shang, 2012	ZDF	N	N	Y	N	N	N	N	Y	M	Y	Y	II	Y
			0	0	1	0	0	0	0	1
	Acarbose
	Yuen, 2016	ZDF	Y	Y	Y	N	N	Y	Y	Y	M	Y	Y	II	Y
	Yang, 2000	ZDF	N	Y	Y	N	N	N	N	N	-	Y	Y	II	Y
	Sturis, 1995	ZDF	N	N	Y	N	N	N	N	Y	M	Y	Y	II	Y
	Friedman, 1991	ZDF	N	Y	N	N	N	N	N	Y	M	Y	Y	II	Y
			0.25	0.75	0.75	0	0	0.25	0.25	0.75
	Exenatide
	Zhou, 2015	ZDF	N	Y	Y	N	N	N	N	Y	M	Y	Y	II	Y
	Kakimoto, 2013	ZDF	N	Y	Y	N	N	Y	N	Y	M	Y	Y	II	Y
	Tartakiewicz, 2013	ZDF	Y	Y	Y	N	N	N	Y	Y	M	Y	Y	II	Y
	Castillo, 2012	ZDF	N	N	Y	N	N	N	N	N	-	Y	Y	II	Y
	Vrang, 2012	ZDF	Y	Y	Y	N	N	Y	N	Y	B	Y	Y	II	Y
	Kwak, 2010	ZDF	N	Y	Y	N	N	N	Y	Y	M	Y	Y	II	Y
	Kwak, 2009	ZDF	N	Y	Y	N	N	N	Y	Y	M	Y	Y	II	Y
	Gedulin, 2005	ZDF	N	Y	Y	N	N	N	Y	Y	M	Y	Y	II	Y
			0.25	0.875	1	0	0	0.25	0.5	0.875
	Glibenclamide
	Tsumura, 2017	ZDF	N	Y	N	N	N	N	N	Y	M	Y	Y	II	Y
	Hansen, 2014	ZDF	Y	Y	Y	N	N	Y	N	Y	M	Y	Y	II	N
			0.5	1	0.5	0	0	0.5	0	1
	Sitagliptin
	Oguma, 2015	ZDF	N	Y	Y	N	N	N	Y	Y	M	Y	Y	II	Y
	Takai, 2014	ZDF	N	N	Y	N	N	N	N	Y	M	Y	Y	II	Y
	Marques, 2014	ZDF	N	Y	Y	N	N	N	N	N	-	Y	Y	II	Y
	Mega, 2014	ZDF	N	Y	Y	N	N	N	Y	Y	M	Y	Y	II	Y
	Forest, 2014	ZDF	Y	Y	Y	N	N	Y	N	Y	M	Y	Y	II	N
	Gonçalvez, 2012	ZDF	N	Y	Y	N	N	N	N	Y	M	Y	Y	II	Y
	Shang, 2012	ZDF	N	N	Y	N	N	N	N	Y	M	Y	Y	II	N
	Mega, 2011	ZDF	N	Y	Y	N	N	N	Y	Y	M	Y	Y	II	Y
	Han, 2011	ZDF	Y	Y	Y	N	N	Y	Y	Y	M	Y	Y	II	Y
	Ferreira, 2010	ZDF	N	Y	Y	N	N	N	N	Y	M	Y	Y	II	Y
			0.2	0.8	1	0	0	0.2	0.4	0.9
	Canagliflozin
	Oguma, 2015, 267	ZDF	N	Y	Y	N	N	N	Y	Y	M	Y	Y	II	Y
	Oguma, 2015, 456	ZDF	N	Y	Y	N	N	N	Y	Y	M	Y	Y	II	Y
	Watanabe, 2015	ZDF	Y	Y	Y	N	N	N	Y	Y	M	Y	Y	II	Y
	Kuriyama, 2014	ZDF	N	Y	Y	N	N	N	N	Y	M	Y	Y	II	Y
	Ueta, 2014	ZDF	N	Y	Y	N	N	N	N	Y	M	Y	Y	II	Y
	Liang, 2012	ZDF	N	N	Y	N	N	N	N	Y	M	Y	Y	II	Y
			0.166667	0.833333	1	0	0	0	0.5	1
	Metformin
	Nistala, 2017	ZDF	N	Y	Y	N	N	N	Y	Y	M	Y	Y	II	P
	Tsumura, 2017	ZDF	N	Y	N	N	N	N	N	Y	M	Y	Y	II	Y
	Othman, 2016	ZDF	N	Y	Y	N	N	Y	Y	Y	M	Y	N	I	-
	Dong, 2016	ZDF	Y	Y	Y	N	N	Y	Y	Y	M	Y	Y	II	Y
	Chen, 2015	ZDF	N	Y	Y	N	N	Y	Y	Y	M	Y	Y	II	Y
	Forest, 2014	ZDF	Y	Y	Y	N	N	Y	N	Y	M	Y	Y	II	Y
	Reimer, 2014	ZDF	Y	Y	Y	N	N	Y	Y	Y	M	Y	Y	II	Y
	Wessels, 2014	ZDF	Y	Y	Y	N	N	N	N	Y	M	Y	Y	II	N
	Konda, 2014	ZDF	N	N	Y	N	N	Y	N	Y	M	Y	Y	II	Y
	Kim, 2013	ZDF	N	Y	Y	N	N	N	N	Y	M	Y	Y	II	Y
	Ito, 2013	ZDF	Y	Y	Y	N	N	N	N	Y	M	Y	Y	II	Y
	Schmid, 2013	ZDF	Y	Y	Y	N	N	N	N	Y	M	Y	Y	II	N
	Han, 2011	ZDF	Y	Y	Y	N	N	Y	Y	Y	M	Y	Y	II	Y
	Takiyama, 2011	ZDF	N	Y	N	N	N	Y	Y	Y	M	Y	Y	II	Y
	Hwang, 2010	ZDF	N	Y	Y	N	N	Y	Y	Y	B	Y	Y	II	Y
	Forcheron, 2009, 452	ZDF	N	Y	Y	N	N	N	Y	Y	M	Y	Y	II	N
	Shoghi, 2009	ZDF	N	Y	Y	N	N	Y	N	Y	M	Y	Y	II	Y
	Forcheron, 2009, 1381	ZDF	N	Y	Y	N	N	N	Y	Y	M	Y	Y	II	N
	Forcheron, 2009, 1	ZDF	N	Y	Y	N	N	N	N	Y	M	Y	Y	II	N
	Metais, 2008	ZDF	N	Y	Y	N	N	N	Y	Y	M	Y	Y	II	N
	Smith, 2007	ZDF	Y	Y	Y	N	N	Y	Y	Y	F	Y	Y	II	Y
	Sreenan, 1996	ZDF	Y	Y	Y	N	N	N	Y	N	-	Y	Y	II	Y
			0.409091	0.954545	0.909091	0	0	0.5	0.590909	0.954545
	Rosiglitazone
	Liu, 2017	ZDF	Y	Y	Y	N	N	Y	Y	Y	M	Y	Y	II	Y
	Beaudoin, 2014	ZDF	Y	Y	Y	N	N	N	Y	Y	M	Y	Y	II	Y
	Kim, 2013	ZDF	N	Y	Y	N	N	N	N	Y	M	Y	Y	II	Y
	Jones, 2013	ZDF	Y	Y	Y	N	N	N	N	Y	M	Y	Y	II	Y
	Nemanich, 2013	ZDF	N	Y	Y	N	N	N	N	N	-	Y	Y	II	Y
	Rohrbach, 2012	ZDF	Y	Y	Y	N	N	Y	Y	Y	M	Y	Y	II	Y
	Schaefer, 2012	ZDF	N	Y	Y	N	N	Y	Y	Y	B	Y	Y	II	Y
	Lu, 2010	ZDF	N	Y	N	N	N	Y	N	N	-	Y	Y	II	N
	Wang, 2010	ZDF	Y	N	Y	N	N	N	N	Y	M	Y	Y	II	N
	Cosson, 2009	ZDF	N	Y	Y	N	N	N	N	Y	M	Y	Y	II	P
	Kanda, 2009	ZDF	Y	Y	Y	N	N	N	Y	Y	M	Y	Y	II	Y
	Mansour, 2009	ZDF	Y	Y	Y	N	N	N	N	Y	M	Y	Y	II	Y
	Shoghi, 2009	ZDF	N	Y	Y	N	N	Y	N	Y	M	Y	Y	II	Y
	Iqbal, 2008	ZDF	Y	Y	Y	N	N	Y	N	Y	M	Y	Y	II	Y
	Oltman, 2008	ZDF	N	Y	Y	N	N	N	Y	Y	M	Y	Y	II	N
	Banz, 2007	ZDF	Y	Y	Y	N	N	Y	N	Y	M	Y	Y	II	Y
	Gonzalez, 2007	ZDF	N	N	N	N	N	N	N	Y	B	Y	Y	II	Y
	Nadeau, 2007	ZDF	N	Y	Y	N	N	Y	N	Y	M	Y	Y	II	Y
	Shi, 2007	ZDF	N	N	N	N	N	N	N	N	-	Y	Y	II	Y
	Banz, 2005	ZDF	Y	Y	Y	N	N	Y	N	Y	F	Y	Y	II	Y
	Johns, 2005	ZDF	N	N	Y	N	N	N	N	Y	M	Y	Y	II	N
	Chen, 2005	ZDF	N	Y	Y	N	N	N	N	Y	M	Y	Y	II	Y
	Reifel-Miller, 2005	ZDF	N	N	Y	N	N	N	Y	Y	M	Y	Y	II	Y
	Winter, 2005	ZDF	Y	Y	Y	N	N	Y	Y	N	-	Y	Y	II	Y
	Yue, 2005	ZDF	N	N	Y	N	N	N	N	Y	M	Y	Y	II	Y
	Banz, 2004	ZDF	Y	Y	Y	N	N	Y	Y	Y	M	Y	N	I	-
	Brand, 2003	ZDF	N	Y	Y	N	N	N	N	Y	M	Y	Y	II	Y
	Kuhlmann, 2003	ZDF	Y	Y	Y	N	N	N	N	Y	M	Y	Y	II	Y
	Yuen, 2003	ZDF	Y	Y	Y	N	N	Y	Y	Y	M	Y	Y	II	N
	Kim, 2002, 923	ZDF	Y	Y	Y	N	N	Y	Y	Y	M	Y	Y	II	Y
	Kim, 2002, 917	ZDF	Y	Y	Y	N	N	Y	Y	Y	M	Y	Y	II	Y
	Ahuja, 2001	ZDF	N	N	Y	N	N	N	N	Y	M	Y	Y	II	Y
	Dana, 2001	ZDF	N	Y	Y	N	N	N	Y	Y	M	Y	Y	II	Y
	Finegood, 2001	ZDF	Y	Y	Y	N	N	Y	Y	Y	M	Y	Y	II	Y
	Way, 2001	ZDF	N	Y	N	N	N	N	N	Y	M	Y	Y	II	Y
	Cai, 2000	ZDF	N	Y	Y	N	N	N	Y	Y	M	Y	Y	II	Y
	Maier, 2000	ZDF	N	Y	Y	N	N	N	Y	Y	M	Y	Y	II	Y
	Smith, 2000	ZDF	N	Y	Y	N	N	Y	Y	Y	M	Y	Y	II	Y
	Piercy, 1999	ZDF	Y	Y	Y	N	N	N	Y	Y	M	Y	Y	II	Y
			0.461538	0.820513	0.897436	0	0	0.410256	0.461538	0.897436
	GS-9667/CVT-3619
	Dhalla, 2009	ZDF	Y	Y	Y	N	N	N	N	Y	M	Y	Y	II	N
			1	1	1	0	0	0	0	1
	CS-917
	Dang, 2007	ZDF	N	N	Y	N	N	N	N	Y	M	Y	Y	II	N
	van Poelje, 2006	ZDF	N	Y	Y	N	N	N	Y	Y	B	Y	Y	II	N
	Erion, 2005	ZDF	N	Y	Y	N	N	Y	N	Y	M	Y	Y	II	N
			0	0.666667	1	0	0	0.333333	0.333333	1
			96
	Canagliflozin
	Liang, 2012	db/db C57BL/KsJ	N	N	N	N	N	N	N	Y	M	Y	Y	II	Y	C57BL/KsJ	C57BL/KsJ
			0	0	0	0	0	0	0	1
	Sitagliptin
	Kushwaha, 2015	db/db C57BL/KsJ	N	N	N	N	N	N	N	N	-	Y	Y	II	Y	C57BL/KsJ	C57BL/KsJ
			0	0	0	0	0	0	0	0
	Nateglinide
	Yoshida, 2011	db/db C57BL/KsJ	N	N	Y	N	N	N	N	Y	M	Y	Y	II	N	Unknown	Unknown
			0	0	1	0	0	0	0	1
	Glibenclamide
	Yoshida, 2011	db/db C57BL/KsJ	N	N	Y	N	N	N	N	Y	M	Y	Y	II	N	Unknown	Unknown
	Chen, 2016	db/db C57BL/KsJ	Y	Y	Y	N	N	Y	N	Y	M	Y	Y	II	Y	C57BL/KsJ	C57BL/KsJ
	Li, 2015	db/db C57BL/KsJ	N	N	Y	N	N	N	N	Y	M	Y	Y	II	Y	C57BL/KsJ	C57BL/KsJ
	Yoshida, 2010	db/db C57BL/KsJ	N	N	Y	N	N	N	N	Y	M	Y	Y	II	Y	Unknown	Unknown
	Liu, 2000	db/db C57BL/KsJ	Y	Y	Y	N	N	N	N	Y	M	Y	Y	II	Y	Unknown	Unknown
	Carroll, 1985	db/db C57BL/KsJ	Y	Y	Y	N	N	N	N	Y	F	Y	Y	II	N	C57BL/KsJ	C57BL/KsJ
	Chakrabarti, 2006	db/db C57BL/KsJ	N	Y	Y	N	N	N	N	Y	M	Y	Y	II	N	C57BL/KsJ	C57BL/KsJ
			0.428571	0.571429	1	0	0	0.142857	0	1						0.571429	0.571429
	Acarbose
	Han, 2017	db/db C57BL/KsJ	Y	Y	Y	N	N	N	N	Y	M	Y	Y	II	Y	C57BL/KsJ C57BL/6	C57BL/KsJ
	Kim, 2014	db/db C57BL/KsJ	Y	Y	Y	N	N	N	N	Y	M	Y	Y	II	Y	C57BL/KsJ	C57BL/KsJ
	Lee, 2014	db/db C57BL/KsJ	Y	Y	Y	N	N	Y	Y	Y	M	Y	Y	II	Y	C57BL/KsJ	C57BL/KsJ
	Xiong, 2013	db/db C57BL/KsJ	Y	Y	Y	N	N	Y	Y	Y	M	Y	Y	II	Y	C57BL/KsJ	C57BL/KsJ
	Kim, 2011	db/db C57BL/KsJ	N	Y	Y	N	N	Y	Y	Y	M	Y	Y	II	Y	C57BL/KsJ	C57BL/KsJ
	Kang, 2010	db/db C57BL/KsJ	N	Y	Y	N	N	Y	Y	Y	M	Y	Y	II	Y	C57BL/KsJ	C57BL/KsJ
	Tang, 2001	db/db C57BL/KsJ	Y	Y	Y	N	N	N	N	Y	M	Y	Y	II	Y	C57BL/KsJ	C57BL/KsJ
	Cheng, 2006	db/db C57BL/KsJ	Y	Y	Y	N	N	N	Y	Y	M	Y	Y	II	Y	C57BL/KsJ	C57BL/KsJ
	Lee, 1982	db/db C57BL/KsJ	N	N	Y	N	N	N	N	Y	B	Y	Y	II	P	C57BL/KsJ	C57BL/KsJ
			0.666667	0.888889	1	0	0	0.444444	0.555556	1						1	1
	Exenatide
	Zhao, 2017	db/db C57BL/KsJ	N	N	Y	N	N	N	N	Y	M	Y	Y	II	Y	Unknown	Unknown
	Hernández, 2016	db/db C57BL/KsJ	N	N	Y	N	N	N	N	Y	M	Y	N	I	-	C57BL/KsJ	C57BL/KsJ
	Hou, 2015	db/db C57BL/KsJ	Y	Y	Y	N	N	Y	N	Y	F	Y	Y	II	P	C57BL/KsJ	C57BL/KsJ
	Nakashima, 2014	db/db C57BL/KsJ	N	Y	Y	N	N	N	N	Y	M	Y	Y	II	Y	C57BL/KsJ	C57BL/KsJ
	Liang, 2014	db/db C57BL/KsJ	N	N	Y	N	N	N	N	Y	M	Y	Y	II	P	C57BL/KsJ	C57BL/KsJ
	Zhang, 2014	db/db C57BL/KsJ	Y	Y	Y	N	N	N	Y	Y	M	Y	Y	II	Y	C57BL/KsJ	C57BL/KsJ
	Yu, 2013	db/db C57BL/KsJ	N	Y	Y	N	N	N	N	N	-	Y	Y	II	Y	Unknown	Unknown
	Dhanesha, 2013	db/db C57BL/KsJ	N	N	Y	N	N	Y	N	Y	M	Y	Y	II	Y	C57BL/KsJ	C57BL/KsJ
	Fosgerau, 2013	db/db C57BL/KsJ	N	Y	Y	N	N	N	N	Y	M	Y	Y	II	P	C57BL/KsJ	C57BL/KsJ
	Liu, 2012	db/db C57BL/KsJ	N	N	Y	N	N	N	N	Y	F	Y	Y	II	Y	C57BL/KsJ	C57BL/KsJ
	Rieg, 2012	db/db C57BL/KsJ	N	N	Y	N	N	Y	N	N	-	Y	Y	II	Y	C57BL/KsJ	C57BL/KsJ
	Patel, 2013	db/db C57BL/KsJ	Y	Y	Y	N	N	Y	N	Y	M	Y	Y	II	Y	C57BL/KsJ	C57BL/KsJ
	Kan, 2012	db/db C57BL/KsJ	Y	Y	Y	N	N	N	N	N	-	Y	Y	II	N	C57BL/KsJ	C57BL/KsJ
	Dhanesha, 2012	db/db C57BL/KsJ	N	Y	Y	N	N	N	N	Y	M	Y	Y	II	Y	C57BL/KsJ	C57BL/KsJ
	Liu, 2011	db/db C57BL/KsJ	N	Y	Y	N	N	N	N	Y	M	Y	N	I	-	C57BL/KsJ	C57BL/KsJ
	Hamilton, 2011	db/db C57BL/KsJ	Y	Y	Y	N	N	N	N	N	-	Y	N	I	-	C57BL/KsJ	C57BL/KsJ
	Gedulin, 2008	db/db C57BL/KsJ	N	N	Y	N	N	N	N	Y	M	Y	Y	II	Y	Unknown	Unknown
	Park, 2007	db/db C57BL/KsJ	N	Y	Y	N	N	N	N	Y	M	Y	Y	II	N	C57BL/KsJ	C57BL/KsJ
	Wang, 2002	db/db C57BL/KsJ	N	Y	Y	N	N	N	N	Y	F	Y	Y	II	Y	C57BL/KsJ	C57BL/KsJ
	Rolin, 2002	db/db C57BL/KsJ	Y	Y	Y	N	N	N	Y	Y	F	Y	Y	II	Y	C57BL/KsJ	C57BL/KsJ
			0.3	0.65	1	0	0	0.2	0.1	0.8						0.85	0.85
	Metformin
	Chen, 2016	db/db C57BL/KsJ	Y	Y	Y	N	N	Y	N	Y	M	Y	Y	II	Y	C57BL/KsJ	C57BL/KsJ
	Li, 2015	db/db C57BL/KsJ	N	N	Y	N	N	N	N	Y	M	Y	Y	II	Y	C57BL/KsJ	C57BL/KsJ
	Tang, 2001	db/db C57BL/KsJ	Y	Y	Y	N	N	N	N	Y	M	Y	Y	II	Y	C57BL/KsJ	C57BL/KsJ
	Cheng, 2017	db/db C57BL/KsJ	Y	Y	Y	N	N	Y	Y	Y	F	Y	Y	II	Y	C57BL/KsJ	C57BL/KsJ
	Dludla, 2017	db/db C57BL/KsJ	N	N	Y	N	N	N	N	Y	M	Y	Y	II	N	C57BL/KsJ	C57BL/KsJ
	Huang, 2016	db/db C57BL/KsJ	N	Y	Y	N	N	Y	N	Y	M	Y	Y	II	Y	C57BL/KsJ	C57BL/KsJ
	Bae, 2016	db/db C57BL/KsJ	N	Y	Y	N	N	Y	Y	Y	M	Y	Y	II	Y	C57BL/KsJ	C57BL/KsJ
	Adam, 2016	db/db C57BL/KsJ	N	Y	Y	N	N	N	N	Y	M	Y	N	I	-	C57BL/KsJ	C57BL/KsJ
	Mitchell, 2017	db/db C57BL/KsJ	N	Y	Y	N	N	Y	Y	N	-	Y	Y	II	Y	C57BL/KsJ	C57BL/KsJ
	Gallo, 2016	db/db C57BL/KsJ	N	Y	Y	N	N	Y	N	Y	M	Y	Y	II	N	C57BL/KsJ	C57BL/KsJ
	Bao, 2016	db/db C57BL/KsJ	N	Y	Y	N	N	Y	Y	Y	M	Y	Y	II	Y	C57BL/KsJ	C57BL/KsJ
	Asare, 2015	db/db C57BL/KsJ	N	Y	Y	N	N	Y	Y	Y	M	Y	Y	II	Y	Unknown	Unknown
	Solini, 2016	db/db C57BL/KsJ	N	Y	Y	N	N	N	N	Y	M	Y	Y	II	Y	C57BL/KsJ	C57BL/KsJ
	Kim, 2015	db/db C57BL/KsJ	N	Y	Y	N	N	Y	N	N	-	Y	N	I	-	Unknown	Unknown
	Wang, 2015	db/db C57BL/KsJ	N	Y	Y	N	N	Y	N	Y	M	Y	Y	II	Y	C57BL/KsJ	C57BL/KsJ
	Cheng, 2014	db/db C57BL/KsJ	N	Y	Y	N	N	Y	Y	Y	F	Y	Y	II	Y	C57BL/KsJ	C57BL/KsJ
	Somineni, 2014	db/db C57BL/KsJ	N	Y	Y	N	N	Y	Y	Y	M	Y	Y	II	P	C57BL/KsJ	C57BL/KsJ
	Kim, 2014	db/db C57BL/KsJ	Y	Y	Y	N	N	N	N	Y	M	Y	Y	II	Y	Unknown	Unknown
	Anthony, 2013	db/db C57BL/KsJ	N	Y	Y	N	N	Y	Y	Y	M	Y	Y	II	Y	Unknown	Unknown
	Ly, 2014	db/db C57BL/KsJ	Y	Y	Y	N	N	N	Y	Y	M	Y	Y	II	Y	C57BL/KsJ	C57BL/KsJ
	Bruckbauer, 2013	db/db C57BL/KsJ	Y	Y	Y	N	N	Y	Y	Y	M	Y	Y	II	Y	C57BL/KsJ	C57BL/KsJ
	Tripp, 2012	db/db C57BL/KsJ	Y	Y	Y	N	N	N	N	Y	M	Y	Y	II	Y	C57BL/KsJ	C57BL/KsJ
	Li, 2012	db/db C57BL/KsJ	N	N	Y	N	N	N	Y	Y	M	Y	Y	II	N	Unknown	Unknown
	Caton, 2011	db/db C57BL/KsJ	N	Y	Y	N	N	N	N	Y	M	Y	Y	II	Y	Unknown	Unknown
	Akanksha, 2010	db/db C57BL/KsJ	N	N	Y	N	N	N	N	Y	M	Y	Y	II	Y	C57BL/KsJ	C57BL/KsJ
	Caton, 2010	db/db C57BL/KsJ	N	Y	Y	N	N	N	N	N	-	Y	Y	II	Y	Unknown	Unknown
	Maurya, 2008	db/db C57BL/KsJ	N	N	Y	N	N	N	N	N	-	Y	Y	II	Y	C57BL/KsJ	C57BL/KsJ
	Heishi, 2008	db/db C57BL/KsJ	N	N	Y	N	N	N	N	Y	M	Y	Y	II	Y	C57BL/KsJ	C57BL/KsJ
	Yoon, 2007	db/db C57BL/KsJ	N	Y	Y	N	N	Y	Y	Y	M	Y	Y	II	Y	C57BL/KsJ	C57BL/KsJ
	Heishi, 2006	db/db C57BL/KsJ	N	Y	Y	N	N	N	N	Y	M	Y	Y	II	Y	C57BL/KsJ	C57BL/KsJ
	Fujita, 2005	db/db C57BL/KsJ	Y	Y	Y	N	N	N	Y	Y	M	Y	Y	II	Y	C57BL/KsJ	C57BL/KsJ
	Fujita, 2002	db/db C57BL/KsJ	Y	Y	Y	N	N	N	N	Y	M	Y	Y	II	Y	C57BL/6J	C57BL/KsJ
	Ono, 2000	db/db C57BL/KsJ	Y	Y	N	N	N	N	N	Y	F	Y	Y	II	Y	C57BL/KsJ	C57BL/KsJ
	Raza, 2013	db/db C57BL/KsJ	N	N	N	N	N	N	Y	Y	M	Y	Y	II	Y	Unknown	Unknown
			0.294118	0.794118	0.941176	0	0	0.441176	0.411765	0.882353						0.764706	0.764706
	Rosiglitazone
	Xiong, 2013	db/db C57BL/KsJ	Y	Y	Y	N	N	Y	Y	Y	M	Y	Y	II	Y	C57BL/KsJ	C57BL/KsJ
	Anthony, 2013	db/db C57BL/KsJ	N	Y	Y	N	N	Y	Y	Y	M	Y	Y	II	Y	Unknown	Unknown
	Tripp, 2012	db/db C57BL/KsJ	Y	Y	Y	N	N	N	N	Y	M	Y	Y	II	Y	C57BL/KsJ	C57BL/KsJ
	Raza, 2013	db/db C57BL/KsJ	N	N	N	N	N	N	Y	Y	M	Y	Y	II	Y	Unknown	Unknown
	Combs, 2002	db/db C57BL/KsJ	Y	Y	Y	N	N	N	N	Y	M	Y	Y	II	Y	C57BL/KFJ	C57BL/KFJ
	Lejnev, 2016	db/db C57BL/KsJ	N	Y	Y	N	N	N	N	Y	M	Y	Y	II	Y	C57BL/KsJ	C57BL/KsJ
	Choi, 2016, 507	db/db C57BL/KsJ	N	Y	Y	N	N	Y	Y	Y	M	Y	Y	II	Y	C57BL/KsJ	C57BL/KsJ
	Choi, 2016, 737	db/db C57BL/KsJ	Y	Y	Y	N	N	Y	Y	Y	M	Y	Y	II	Y	C57BL/KsJ	C57BL/KsJ
	Yuan, 2016	db/db C57BL/KsJ	N	Y	Y	N	N	N	N	Y	M	Y	Y	II	Y	Unknown	Unknown
	Feng, 2016	db/db C57BL/KsJ	N	N	Y	N	N	Y	N	Y	F	Y	Y	II	Y	Unknown	Unknown
	Park, 2016	db/db C57BL/KsJ	Y	Y	Y	N	N	Y	Y	Y	M	Y	Y	II	Y	C57BL/KsJ	C57BL/KsJ
	Wang, 2016	db/db C57BL/KsJ	N	Y	Y	N	N	Y	N	Y	M	Y	Y	II	Y	C57BL/KsJ	C57BL/KsJ
	Saito, 2015	db/db C57BL/KsJ	Y	Y	Y	N	Y	Y	N	Y	M	Y	N	I	-	C57BL/KsJ	C57BL/KsJ
	Park, 2015, 472	db/db C57BL/KsJ	Y	Y	Y	N	N	Y	Y	Y	M	Y	Y	II	Y	C57BL/KsJ	C57BL/KsJ
	Park, 2015, 1088	db/db C57BL/KsJ	Y	Y	Y	N	N	Y	Y	Y	M	Y	Y	II	Y	C57BL/KsJ	C57BL/KsJ
	Gim, 2015	db/db C57BL/KsJ	Y	Y	Y	N	N	Y	N	Y	M	Y	Y	II	Y	C57BL/KsJ	C57BL/KsJ
	Sharma, 2015	db/db C57BL/KsJ	N	Y	Y	N	N	N	Y	Y	M	Y	Y	II	Y	C57BL/KsJ	C57BL/KsJ
	Kotlinowski, 2014	db/db C57BL/KsJ	N	Y	Y	N	N	N	N	N	-	Y	Y	II	Y	C57BL/6J	C57BL/KsJ
	Hanf, 2014	db/db C57BL/KsJ	N	N	Y	N	N	Y	N	Y	M	Y	Y	II	Y	Unknown	Unknown
	Mishra, 2014	db/db C57BL/KsJ	N	Y	Y	N	N	Y	N	Y	M	Y	N	I	-	Unknown	Unknown
	Yang, 2013	db/db C57BL/KsJ	Y	Y	Y	N	N	N	N	Y	M	Y	N	I	-	C57BL/KsJ	C57BL/KsJ
	Ye, 2013	db/db C57BL/KsJ	N	Y	Y	N	N	N	N	Y	M	Y	Y	II	Y	Unknown	Unknown
	Chodavarapu, 2013	db/db C57BL/KsJ	Y	Y	Y	N	N	Y	N	Y	M	Y	Y	II	Y	C57BL/KsJ	C57BL/KsJ
	Zhou, 2013	db/db C57BL/KsJ	N	N	Y	N	N	N	N	Y	M	Y	Y	II	Y	C57BL/6J	C57BL/KsJ
	Wein, 2013	db/db C57BL/KsJ	Y	Y	Y	N	N	Y	Y	Y	F	Y	Y	II	Y	C57BL/KsJ	C57BL/KsJ
	Shi, 2013	db/db C57BL/KsJ	N	Y	Y	N	N	Y	Y	N	-	Y	Y	II	Y	C57BL/KsJ	C57BL/KsJ
	He, 2012	db/db C57BL/KsJ	N	Y	Y	N	N	Y	N	Y	M	Y	Y	II	Y	C57BL/KsJ	C57BL/KsJ
	Schrader, 2012	db/db C57BL/KsJ	N	Y	Y	N	N	Y	N	Y	F	Y	Y	II	Y	C57BL/KsJ	C57BL/KsJ
	Do, 2012	db/db C57BL/KsJ	N	N	Y	N	N	Y	N	Y	M	Y	Y	II	Y	C57BL/KsJ	C57BL/KsJ
	Park, 2013	db/db C57BL/KsJ	N	Y	Y	N	N	Y	Y	Y	M	Y	Y	II	Y	C57BL/KsJ	C57BL/KsJ
	Tan, 2012	db/db C57BL/KsJ	N	Y	Y	N	N	N	N	Y	M	Y	N	I	-	C57BL/KFJ	C57BL/KFJ
	Ortsaeter, 2012	db/db C57BL/KsJ	N	Y	Y	N	N	Y	N	N	-	Y	Y	II	Y	C57BL/KsJ	C57BL/KsJ
	Sharma, 2012	db/db C57BL/KsJ	Y	Y	Y	N	N	Y	N	Y	M	Y	Y	II	Y	C57BL/KsJ	C57BL/KsJ
	Lee, 2012, 575	db/db C57BL/KsJ	N	Y	Y	N	N	Y	Y	Y	M	Y	Y	II	Y	C57BL/KsJ	C57BL/KsJ
	Tang, 2012	db/db C57BL/KsJ	N	Y	Y	N	N	Y	Y	Y	M	Y	Y	II	Y	C57BL/KsJ	C57BL/KsJ
	Oishi, 2011	db/db C57BL/KsJ	N	Y	Y	N	N	N	N	Y	M	Y	N	I	-	C57BL/KsJ	C57BL/KsJ
	Keil, 2011	db/db C57BL/KsJ	Y	Y	Y	N	N	N	N	Y	F	Y	Y	II	Y	C57BL/KsJ	C57BL/KsJ
	le Bouter, 2010	db/db C57BL/KsJ	Y	Y	Y	N	N	Y	Y	Y	M	Y	Y	II	Y	C57BL/KsJ	C57BL/KsJ
	Yang, 2010	db/db C57BL/KsJ	N	Y	Y	N	N	N	N	Y	M	Y	Y	II	Y	C57BL/KsJ	C57BL/KsJ
	Seto, 2010	db/db C57BL/KsJ	N	N	Y	N	N	N	N	Y	M	Y	Y	II	Y	Unknown	Unknown
	Jung, 2009	db/db C57BL/KsJ	N	Y	Y	N	N	Y	Y	Y	M	Y	N	I	-	C57BL/KsJ	C57BL/KsJ
	Bak, 2010	db/db C57BL/KsJ	N	Y	N	N	N	Y	N	Y	M	Y	Y	II	Y	C57BL/KsJ	C57BL/KsJ
	Cheng, 2009	db/db C57BL/KsJ	Y	Y	Y	N	N	N	N	Y	M	Y	N	I	-	Unknown	Unknown
	Au, 2009	db/db C57BL/KsJ	Y	Y	Y	N	N	N	Y	Y	M	Y	Y	II	Y	C57BL/KsJ	C57BL/KsJ
	Yun, 2009	db/db C57BL/KsJ	Y	Y	Y	N	N	N	N	Y	M	Y	Y	II	Y	C57BL/KsJ	C57BL/KsJ
	Wu, 2009	db/db C57BL/KsJ	N	N	Y	N	N	N	N	N	-	Y	Y	II	Y	C57BL/KsJ	C57BL/KsJ
	Hui, 2009	db/db C57BL/KsJ	Y	Y	Y	N	N	N	N	Y	M	Y	N	I	-	C57BL/6J	C57BL/KsJ
	Park, 2009	db/db C57BL/KsJ	N	Y	Y	N	N	N	N	Y	M	Y	Y	II	Y	C57BL/6J	C57BL/KsJ
	Yeo, 2008	db/db C57BL/KsJ	Y	Y	Y	N	N	Y	Y	Y	M	Y	Y	II	Y	C57BL/KsJ	C57BL/KsJ
	Wilson, 2008	db/db C57BL/KsJ	N	Y	Y	N	N	N	N	N	-	Y	Y	II	Y	C57BL/KsJ	C57BL/KsJ
	Kim, 2008	db/db C57BL/KsJ	N	Y	Y	N	N	Y	Y	Y	M	Y	Y	II	P	C57BL/KsJ	C57BL/KsJ
	Chang, 2008	db/db C57BL/KsJ	Y	Y	Y	N	N	N	N	Y	M	Y	Y	II	Y	Unknown	Unknown
	Yeo, 2007	db/db C57BL/KsJ	Y	Y	Y	N	N	Y	Y	Y	M	Y	Y	II	Y	C57BL/KsJ	C57BL/KsJ
	How, 2008	db/db C57BL/KsJ	N	Y	Y	N	N	N	N	Y	B	Y	Y	II	Y	C57BL/KsJ	C57BL/KsJ
	Jung, 2008	db/db C57BL/KsJ	N	Y	Y	N	N	N	Y	Y	M	Y	Y	II	Y	C57BL/KsJ	C57BL/KsJ
	Yamanaka, 2007	db/db C57BL/KsJ	Y	Y	Y	N	N	N	N	Y	M	Y	Y	II	Y	C57BL/KsJ	C57BL/KsJ
	Koh, 2007	db/db C57BL/KsJ	Y	Y	Y	N	N	N	N	Y	M	Y	N	I	-	Unknown	Unknown
	Jung, 2007	db/db C57BL/KsJ	N	Y	Y	N	N	Y	Y	Y	M	Y	Y	II	Y	C57BL/KsJ	C57BL/KsJ
	Roy, 2007	db/db C57BL/KsJ	N	Y	Y	N	N	N	N	Y	B	Y	Y	II	Y	C57BL/KsJ	C57BL/KsJ
	Okamoto, 2007	db/db C57BL/KsJ	Y	Y	Y	N	N	N	Y	Y	M	Y	Y	II	Y	C57BL/KsJ	C57BL/KsJ
	Mittra, 2007	db/db C57BL/KsJ	N	Y	Y	N	N	N	Y	Y	B	Y	Y	II	Y	C57BL/KsJ	C57BL/KsJ
	Han, 2007	db/db C57BL/KsJ	N	N	N	N	N	N	N	Y	M	Y	Y	II	Y	Unknown	Unknown
	Wang, 2006	db/db C57BL/KsJ	Y	Y	Y	N	N	N	N	Y	M	Y	Y	II	Y	C57BL/KsJ	C57BL/KsJ
	Choo, 2006	db/db C57BL/KsJ	Y	Y	Y	N	N	N	N	N	-	Y	Y	II	Y	C57BL/KsJ	C57BL/KsJ
	Loffler, 2006	db/db C57BL/KsJ	N	Y	Y	N	N	N	Y	Y	M	Y	Y	II	Y	C57BL/KsJ	C57BL/KsJ
	Reifel-Miller, 2005	db/db C57BL/KsJ	N	N	N	N	N	N	Y	N	-	Y	Y	II	Y	Unknown	Unknown
	Chen, 2005	db/db C57BL/KsJ	N	Y	Y	N	Y	N	N	Y	F	Y	N	I	-	Unknown	Unknown
	Dropinski, 2005	db/db C57BL/KsJ	N	N	N	N	N	N	N	Y	M	Y	Y	II	Y	Unknown	Unknown
	Shi, 2005	db/db C57BL/KsJ	Y	Y	Y	N	N	N	N	Y	M	Y	Y	II	Y	C57BL/KsJ	C57BL/KsJ
	Li, 2005	db/db C57BL/KsJ	N	N	Y	N	N	N	Y	Y	M	Y	Y	II	Y	Unknown	Unknown
	Minoura, 2004	db/db C57BL/KsJ	N	N	Y	N	N	N	N	Y	F	Y	Y	II	Y	C57BL/KsJ	C57BL/KsJ
	Kast-Woelbern, 2004	db/db C57BL/KsJ	N	Y	Y	N	N	N	N	Y	M	Y	N	I	-	Unknown	Unknown
	Arlt, 2004	db/db C57BL/KsJ	N	Y	Y	N	N	N	Y	Y	M	Y	Y	II	Y	C57BL/KsJ	C57BL/KsJ
	Shen, 2004	db/db C57BL/KsJ	N	Y	Y	N	N	N	Y	Y	M	Y	Y	II	Y	Unknown	Unknown
	Bagi, 2004	db/db C57BL/KsJ	N	Y	Y	N	N	N	N	Y	M	Y	Y	II	N	C57BL/KsJ	C57BL/KsJ
	Desai, 2003	db/db C57BL/KsJ	N	Y	Y	N	N	N	N	Y	M	Y	Y	II	Y	Unknown	Unknown
	Misra, 2003	db/db C57BL/KsJ	N	N	Y	N	N	N	N	Y	M	Y	N	I	-	Unknown	Unknown
	Koyama, 2003	db/db C57BL/KsJ	N	N	Y	N	N	N	N	Y	M	Y	Y	II	Y	Unknown	Unknown
	Edwards, 2003	db/db C57BL/KsJ	N	N	Y	N	N	N	N	Y	M	Y	N	I	-	Unknown	Unknown
	Adams, 2003	db/db C57BL/KsJ	N	N	N	N	N	N	N	N	-	Y	Y	II	Y	Unknown	Unknown
	Vikramadithyan, 2003	db/db C57BL/KsJ	N	Y	Y	N	N	N	N	Y	M	Y	N	I	-	C57BL/KsJ	C57BL/KsJ
	Chakrabarti, 2002	db/db C57BL/KsJ	N	Y	Y	N	N	N	N	N	-	Y	Y	II	Y	C57BL/KsJ	C57BL/KsJ
	Hori, 2002	db/db C57BL/KsJ	Y	Y	Y	N	N	N	N	Y	M	Y	Y	II	Y	C57BL/KsJ	C57BL/KsJ
	Madhavan, 2002	db/db C57BL/KsJ	N	Y	Y	N	N	N	N	Y	M	Y	Y	II	Y	C57BL/KsJ	C57BL/KsJ
	Gerhold, 2002	db/db C57BL/KsJ	Y	Y	Y	N	N	N	N	Y	M	Y	Y	II	Y	C57BL/KFJ	C57BL/KFJ
	Etgen, 2002	db/db C57BL/KsJ	Y	Y	Y	N	N	Y	N	Y	M	Y	N	I	-	C57BL/KsJ	C57BL/KsJ
	Clapham, 2001	db/db C57BL/KsJ	Y	Y	N	N	N	Y	Y	Y	F	Y	Y	II	Y	C57BL/KsJ	C57BL/KsJ
	Moore, 2001	db/db C57BL/KsJ	Y	Y	Y	N	N	N	Y	Y	F	Y	Y	II	Y	C57BL/KsJ	C57BL/KsJ
	Lohray, 2001	db/db C57BL/KsJ	N	Y	Y	N	N	N	N	Y	M	Y	Y	II	Y	C57BL/KsJ	C57BL/KsJ
	Vikramadithyan, 2000	db/db C57BL/KsJ	N	Y	Y	N	N	N	Y	Y	M	Y	Y	II	Y	C57BL/KsJ	C57BL/KsJ
	Chaput, 2000	db/db C57BL/KsJ	Y	Y	Y	N	N	Y	Y	Y	M	Y	Y	II	Y	Unknown	Unknown
	Chakrabarti, 1999	db/db C57BL/KsJ	N	Y	Y	N	N	N	N	Y	M	Y	Y	II	Y	C57BL/KsJ	C57BL/KsJ
	Lohray, 1999	db/db C57BL/KsJ	N	Y	Y	N	N	N	Y	Y	M	Y	Y	II	Y	C57BL/KsJ	C57BL/KsJ
	Burris, 1999	db/db C57BL/KsJ	N	N	N	N	N	N	N	Y	F	Y	N	I	-	C57BL/KFJ	C57BL/KFJ
	Lohray, 1998	db/db C57BL/KsJ	N	Y	Y	N	N	N	Y	Y	M	Y	Y	II	Y	C57BL/KFJ	C57BL/KFJ
	Connor, 1997	db/db C57BL/KsJ	Y	Y	Y	N	N	N	Y	Y	F	Y	Y	II	Y	C57BL/KFJ	C57BL/KFJ
			0.364583	0.822917	0.916667	0	0.0208333	0.354167	0.375	0.90625						0.75	0.75
			169

## Sheet: QA Calculation
			Quality Assessment									Outcomes			In line
	Reference	Model	Housing	Husbandry	Sample Size	Sample Size Calculation	Blinding	Randomisation	Acclimatisation	Sex Disclosed	M, F or M/F	BHP	F	Category	Y/N/P	Background Ctrl	Background Model
	Chen, 2010	ZDF	N	Y	N	N	N	Y	Y	Y	M	Y	Y	II	Y
	Yuen, 2016	ZDF	Y	Y	Y	N	N	Y	Y	Y	M	Y	Y	II	Y
	Yang, 2000	ZDF	N	Y	Y	N	N	N	N	N	-	Y	Y	II	Y
	Sturis, 1995	ZDF	N	N	Y	N	N	N	N	Y	M	Y	Y	II	Y
	Friedman, 1991	ZDF	N	Y	N	N	N	N	N	Y	M	Y	Y	II	Y
	Zhou, 2015	ZDF	N	Y	Y	N	N	N	N	Y	M	Y	Y	II	Y
	Kakimoto, 2013	ZDF	N	Y	Y	N	N	Y	N	Y	M	Y	Y	II	Y
	Tartakiewicz, 2013	ZDF	Y	Y	Y	N	N	N	Y	Y	M	Y	Y	II	Y
	Castillo, 2012	ZDF	N	N	Y	N	N	N	N	N	-	Y	Y	II	Y
	Vrang, 2012	ZDF	Y	Y	Y	N	N	Y	N	Y	B	Y	Y	II	Y
	Kwak, 2010	ZDF	N	Y	Y	N	N	N	Y	Y	M	Y	Y	II	Y
	Kwak, 2009	ZDF	N	Y	Y	N	N	N	Y	Y	M	Y	Y	II	Y
	Gedulin, 2005	ZDF	N	Y	Y	N	N	N	Y	Y	M	Y	Y	II	Y
	Tsumura, 2017	ZDF	N	Y	N	N	N	N	N	Y	M	Y	Y	II	Y
	Hansen, 2014	ZDF	Y	Y	Y	N	N	Y	N	Y	M	Y	Y	II	N
	Oguma, 2015	ZDF	N	Y	Y	N	N	N	Y	Y	M	Y	Y	II	Y
	Takai, 2014	ZDF	N	N	Y	N	N	N	N	Y	M	Y	Y	II	Y
	Marques, 2014	ZDF	N	Y	Y	N	N	N	N	N	-	Y	Y	II	Y
	Mega, 2014	ZDF	N	Y	Y	N	N	N	Y	Y	M	Y	Y	II	Y
	Forest, 2014	ZDF	Y	Y	Y	N	N	Y	N	Y	M	Y	Y	II	N
	Gonçalvez, 2012	ZDF	N	Y	Y	N	N	N	N	Y	M	Y	Y	II	Y
	Shang, 2012	ZDF	N	N	Y	N	N	N	N	Y	M	Y	Y	II	N
	Mega, 2011	ZDF	N	Y	Y	N	N	N	Y	Y	M	Y	Y	II	Y
	Han, 2011	ZDF	Y	Y	Y	N	N	Y	Y	Y	M	Y	Y	II	Y
	Ferreira, 2010	ZDF	N	Y	Y	N	N	N	N	Y	M	Y	Y	II	Y
	Oguma, 2015, 267	ZDF	N	Y	Y	N	N	N	Y	Y	M	Y	Y	II	Y
	Oguma, 2015, 456	ZDF	N	Y	Y	N	N	N	Y	Y	M	Y	Y	II	Y
	Watanabe, 2015	ZDF	Y	Y	Y	N	N	N	Y	Y	M	Y	Y	II	Y
	Kuriyama, 2014	ZDF	N	Y	Y	N	N	N	N	Y	M	Y	Y	II	Y
	Ueta, 2014	ZDF	N	Y	Y	N	N	N	N	Y	M	Y	Y	II	Y
	Liang, 2012	ZDF	N	N	Y	N	N	N	N	Y	M	Y	Y	II	Y
	Nistala, 2017	ZDF	N	Y	Y	N	N	N	Y	Y	M	Y	Y	II	P
	Othman, 2016	ZDF	N	Y	Y	N	N	Y	Y	Y	M	Y	N	I	-
	Dong, 2016	ZDF	Y	Y	Y	N	N	Y	Y	Y	M	Y	Y	II	Y
	Chen, 2015	ZDF	N	Y	Y	N	N	Y	Y	Y	M	Y	Y	II	Y
	Reimer, 2014	ZDF	Y	Y	Y	N	N	Y	Y	Y	M	Y	Y	II	Y
	Wessels, 2014	ZDF	Y	Y	Y	N	N	N	N	Y	M	Y	Y	II	N
	Konda, 2014	ZDF	N	N	Y	N	N	Y	N	Y	M	Y	Y	II	Y
	Kim, 2013	ZDF	N	Y	Y	N	N	N	N	Y	M	Y	Y	II	Y
	Ito, 2013	ZDF	Y	Y	Y	N	N	N	N	Y	M	Y	Y	II	Y
	Schmid, 2013	ZDF	Y	Y	Y	N	N	N	N	Y	M	Y	Y	II	N
	Takiyama, 2011	ZDF	N	Y	N	N	N	Y	Y	Y	M	Y	Y	II	Y
	Hwang, 2010	ZDF	N	Y	Y	N	N	Y	Y	Y	B	Y	Y	II	Y
	Forcheron, 2009, 452	ZDF	N	Y	Y	N	N	N	Y	Y	M	Y	Y	II	N
	Shoghi, 2009	ZDF	N	Y	Y	N	N	Y	N	Y	M	Y	Y	II	Y
	Forcheron, 2009, 1381	ZDF	N	Y	Y	N	N	N	Y	Y	M	Y	Y	II	N
	Forcheron, 2009, 1	ZDF	N	Y	Y	N	N	N	N	Y	M	Y	Y	II	N
	Metais, 2008	ZDF	N	Y	Y	N	N	N	Y	Y	M	Y	Y	II	N
	Smith, 2007	ZDF	Y	Y	Y	N	N	Y	Y	Y	F	Y	Y	II	Y
	Sreenan, 1996	ZDF	Y	Y	Y	N	N	N	Y	N	-	Y	Y	II	Y
	Liu, 2017	ZDF	Y	Y	Y	N	N	Y	Y	Y	M	Y	Y	II	Y
	Beaudoin, 2014	ZDF	Y	Y	Y	N	N	N	Y	Y	M	Y	Y	II	Y
	Jones, 2013	ZDF	Y	Y	Y	N	N	N	N	Y	M	Y	Y	II	Y
	Nemanich, 2013	ZDF	N	Y	Y	N	N	N	N	N	-	Y	Y	II	Y
	Rohrbach, 2012	ZDF	Y	Y	Y	N	N	Y	Y	Y	M	Y	Y	II	Y
	Schaefer, 2012	ZDF	N	Y	Y	N	N	Y	Y	Y	B	Y	Y	II	Y
	Lu, 2010	ZDF	N	Y	N	N	N	Y	N	N	-	Y	Y	II	N
	Wang, 2010	ZDF	Y	N	Y	N	N	N	N	Y	M	Y	Y	II	N
	Cosson, 2009	ZDF	N	Y	Y	N	N	N	N	Y	M	Y	Y	II	P
	Kanda, 2009	ZDF	Y	Y	Y	N	N	N	Y	Y	M	Y	Y	II	Y
	Mansour, 2009	ZDF	Y	Y	Y	N	N	N	N	Y	M	Y	Y	II	Y
	Iqbal, 2008	ZDF	Y	Y	Y	N	N	Y	N	Y	M	Y	Y	II	Y
	Oltman, 2008	ZDF	N	Y	Y	N	N	N	Y	Y	M	Y	Y	II	N
	Banz, 2007	ZDF	Y	Y	Y	N	N	Y	N	Y	M	Y	Y	II	Y
	Gonzalez, 2007	ZDF	N	N	N	N	N	N	N	Y	B	Y	Y	II	Y
	Nadeau, 2007	ZDF	N	Y	Y	N	N	Y	N	Y	M	Y	Y	II	Y
	Shi, 2007	ZDF	N	N	N	N	N	N	N	N	-	Y	Y	II	Y
	Banz, 2005	ZDF	Y	Y	Y	N	N	Y	N	Y	F	Y	Y	II	Y
	Johns, 2005	ZDF	N	N	Y	N	N	N	N	Y	M	Y	Y	II	N
	Chen, 2005	ZDF	N	Y	Y	N	N	N	N	Y	M	Y	Y	II	Y
	Reifel-Miller, 2005	ZDF	N	N	Y	N	N	N	Y	Y	M	Y	Y	II	Y
	Winter, 2005	ZDF	Y	Y	Y	N	N	Y	Y	N	-	Y	Y	II	Y
	Yue, 2005	ZDF	N	N	Y	N	N	N	N	Y	M	Y	Y	II	Y
	Banz, 2004	ZDF	Y	Y	Y	N	N	Y	Y	Y	M	Y	N	I	-
	Brand, 2003	ZDF	N	Y	Y	N	N	N	N	Y	M	Y	Y	II	Y
	Kuhlmann, 2003	ZDF	Y	Y	Y	N	N	N	N	Y	M	Y	Y	II	Y
	Yuen, 2003	ZDF	Y	Y	Y	N	N	Y	Y	Y	M	Y	Y	II	N
	Kim, 2002, 923	ZDF	Y	Y	Y	N	N	Y	Y	Y	M	Y	Y	II	Y
	Kim, 2002, 917	ZDF	Y	Y	Y	N	N	Y	Y	Y	M	Y	Y	II	Y
	Ahuja, 2001	ZDF	N	N	Y	N	N	N	N	Y	M	Y	Y	II	Y
	Dana, 2001	ZDF	N	Y	Y	N	N	N	Y	Y	M	Y	Y	II	Y
	Finegood, 2001	ZDF	Y	Y	Y	N	N	Y	Y	Y	M	Y	Y	II	Y
	Way, 2001	ZDF	N	Y	N	N	N	N	N	Y	M	Y	Y	II	Y
	Cai, 2000	ZDF	N	Y	Y	N	N	N	Y	Y	M	Y	Y	II	Y
	Maier, 2000	ZDF	N	Y	Y	N	N	N	Y	Y	M	Y	Y	II	Y
	Smith, 2000	ZDF	N	Y	Y	N	N	Y	Y	Y	M	Y	Y	II	Y
	Piercy, 1999	ZDF	Y	Y	Y	N	N	N	Y	Y	M	Y	Y	II	Y
	Dhalla, 2009	ZDF	Y	Y	Y	N	N	N	N	Y	M	Y	Y	II	N
	Dang, 2007	ZDF	N	N	Y	N	N	N	N	Y	M	Y	Y	II	N
	van Poelje, 2006	ZDF	N	Y	Y	N	N	N	Y	Y	B	Y	Y	II	N
	Erion, 2005	ZDF	N	Y	Y	N	N	Y	N	Y	M	Y	Y	II	N
			0	0.666667	1	0	0	0.333333	0.333333	1
		ZDF total	0.362637	0.846154	0.912088	0	0	0.351648	0.483516	0.912088	0.915663
			91								0.0240964
											0.060241
											83
	Liang, 2012	db/db C57BL/KsJ	N	N	N	N	N	N	N	Y	M	Y	Y	II	Y	C57BL/KsJ	C57BL/KsJ
	Kanie, 2002	db/db C57BL/KsJ	N	Y	Y	N	N	N	N	Y	M	Y	Y	II	Y	C57BL/KsJ	C57BL/KsJ
	Yoshida, 2011	db/db C57BL/KsJ	N	N	Y	N	N	N	N	Y	M	Y	Y	II	N	Unknown	Unknown
	Chen, 2016	db/db C57BL/KsJ	Y	Y	Y	N	N	Y	N	Y	M	Y	Y	II	Y	C57BL/KsJ	C57BL/KsJ
	Li, 2015	db/db C57BL/KsJ	N	N	Y	N	N	N	N	Y	M	Y	Y	II	Y	C57BL/KsJ	C57BL/KsJ
	Yoshida, 2010	db/db C57BL/KsJ	N	N	Y	N	N	N	N	Y	M	Y	Y	II	Y	Unknown	Unknown
	Liu, 2000	db/db C57BL/KsJ	Y	Y	Y	N	N	N	N	Y	M	Y	Y	II	Y	Unknown	Unknown
	Carroll, 1985	db/db C57BL/KsJ	Y	Y	Y	N	N	N	N	Y	F	Y	Y	II	N	C57BL/KsJ	C57BL/KsJ
	Chakrabarti, 2006	db/db C57BL/KsJ	N	Y	Y	N	N	N	N	Y	M	Y	Y	II	N	C57BL/KsJ	C57BL/KsJ
	Han, 2017	db/db C57BL/KsJ	Y	Y	Y	N	N	N	N	Y	M	Y	Y	II	Y	C57BL/KsJ C57BL/6	C57BL/KsJ
	Kim, 2014	db/db C57BL/KsJ	Y	Y	Y	N	N	N	N	Y	M	Y	Y	II	Y	C57BL/KsJ	C57BL/KsJ
	Lee, 2014	db/db C57BL/KsJ	Y	Y	Y	N	N	Y	Y	Y	M	Y	Y	II	Y	C57BL/KsJ	C57BL/KsJ
	Xiong, 2013	db/db C57BL/KsJ	Y	Y	Y	N	N	Y	Y	Y	M	Y	Y	II	Y	C57BL/KsJ	C57BL/KsJ
	Kim, 2011	db/db C57BL/KsJ	N	Y	Y	N	N	Y	Y	Y	M	Y	Y	II	Y	C57BL/KsJ	C57BL/KsJ
	Kang, 2010	db/db C57BL/KsJ	N	Y	Y	N	N	Y	Y	Y	M	Y	Y	II	Y	C57BL/KsJ	C57BL/KsJ
	Tang, 2001	db/db C57BL/KsJ	Y	Y	Y	N	N	N	N	Y	M	Y	Y	II	Y	C57BL/KsJ	C57BL/KsJ
	Cheng, 2006	db/db C57BL/KsJ	Y	Y	Y	N	N	N	Y	Y	M	Y	Y	II	Y	C57BL/KsJ	C57BL/KsJ
	Lee, 1982	db/db C57BL/KsJ	N	N	Y	N	N	N	N	Y	B	Y	Y	II	P	C57BL/KsJ	C57BL/KsJ
	Zhao, 2017	db/db C57BL/KsJ	N	N	Y	N	N	N	N	Y	M	Y	Y	II	Y	Unknown	Unknown
	Hernández, 2016	db/db C57BL/KsJ	N	N	Y	N	N	N	N	Y	M	Y	N	I	-	C57BL/KsJ	C57BL/KsJ
	Hou, 2015	db/db C57BL/KsJ	Y	Y	Y	N	N	Y	N	Y	F	Y	Y	II	P	C57BL/KsJ	C57BL/KsJ
	Nakashima, 2014	db/db C57BL/KsJ	N	Y	Y	N	N	N	N	Y	M	Y	Y	II	Y	C57BL/KsJ	C57BL/KsJ
	Liang, 2014	db/db C57BL/KsJ	N	N	Y	N	N	N	N	Y	M	Y	Y	II	P	C57BL/KsJ	C57BL/KsJ
	Zhang, 2014	db/db C57BL/KsJ	Y	Y	Y	N	N	N	Y	Y	M	Y	Y	II	Y	C57BL/KsJ	C57BL/KsJ
	Yu, 2013	db/db C57BL/KsJ	N	Y	Y	N	N	N	N	N	-	Y	Y	II	Y	Unknown	Unknown
	Dhanesha, 2013	db/db C57BL/KsJ	N	N	Y	N	N	Y	N	Y	M	Y	Y	II	Y	C57BL/KsJ	C57BL/KsJ
	Fosgerau, 2013	db/db C57BL/KsJ	N	Y	Y	N	N	N	N	Y	M	Y	Y	II	P	C57BL/KsJ	C57BL/KsJ
	Liu, 2012	db/db C57BL/KsJ	N	N	Y	N	N	N	N	Y	F	Y	Y	II	Y	C57BL/KsJ	C57BL/KsJ
	Rieg, 2012	db/db C57BL/KsJ	N	N	Y	N	N	Y	N	N	-	Y	Y	II	Y	C57BL/KsJ	C57BL/KsJ
	Patel, 2013	db/db C57BL/KsJ	Y	Y	Y	N	N	Y	N	Y	M	Y	Y	II	Y	C57BL/KsJ	C57BL/KsJ
	Kan, 2012	db/db C57BL/KsJ	Y	Y	Y	N	N	N	N	N	-	Y	Y	II	N	C57BL/KsJ	C57BL/KsJ
	Dhanesha, 2012	db/db C57BL/KsJ	N	Y	Y	N	N	N	N	Y	M	Y	Y	II	Y	C57BL/KsJ	C57BL/KsJ
	Liu, 2011	db/db C57BL/KsJ	N	Y	Y	N	N	N	N	Y	M	Y	N	I	-	C57BL/KsJ	C57BL/KsJ
	Hamilton, 2011	db/db C57BL/KsJ	Y	Y	Y	N	N	N	N	N	-	Y	N	I	-	C57BL/KsJ	C57BL/KsJ
	Gedulin, 2008	db/db C57BL/KsJ	N	N	Y	N	N	N	N	Y	M	Y	Y	II	Y	Unknown	Unknown
	Park, 2007	db/db C57BL/KsJ	N	Y	Y	N	N	N	N	Y	M	Y	Y	II	N	C57BL/KsJ	C57BL/KsJ
	Wang, 2002	db/db C57BL/KsJ	N	Y	Y	N	N	N	N	Y	F	Y	Y	II	Y	C57BL/KsJ	C57BL/KsJ
	Rolin, 2002	db/db C57BL/KsJ	Y	Y	Y	N	N	N	Y	Y	F	Y	Y	II	Y	C57BL/KsJ	C57BL/KsJ
	Cheng, 2017	db/db C57BL/KsJ	Y	Y	Y	N	N	Y	Y	Y	F	Y	Y	II	Y	C57BL/KsJ	C57BL/KsJ
	Dludla, 2017	db/db C57BL/KsJ	N	N	Y	N	N	N	N	Y	M	Y	Y	II	N	C57BL/KsJ	C57BL/KsJ
	Huang, 2016	db/db C57BL/KsJ	N	Y	Y	N	N	Y	N	Y	M	Y	Y	II	Y	C57BL/KsJ	C57BL/KsJ
	Bae, 2016	db/db C57BL/KsJ	N	Y	Y	N	N	Y	Y	Y	M	Y	Y	II	Y	C57BL/KsJ	C57BL/KsJ
	Adam, 2016	db/db C57BL/KsJ	N	Y	Y	N	N	N	N	Y	M	Y	N	I	-	C57BL/KsJ	C57BL/KsJ
	Mitchell, 2017	db/db C57BL/KsJ	N	Y	Y	N	N	Y	Y	N	-	Y	Y	II	Y	C57BL/KsJ	C57BL/KsJ
	Gallo, 2016	db/db C57BL/KsJ	N	Y	Y	N	N	Y	N	Y	M	Y	Y	II	N	C57BL/KsJ	C57BL/KsJ
	Bao, 2016	db/db C57BL/KsJ	N	Y	Y	N	N	Y	Y	Y	M	Y	Y	II	Y	C57BL/KsJ	C57BL/KsJ
	Asare, 2015	db/db C57BL/KsJ	N	Y	Y	N	N	Y	Y	Y	M	Y	Y	II	Y	Unknown	Unknown
	Solini, 2016	db/db C57BL/KsJ	N	Y	Y	N	N	N	N	Y	M	Y	Y	II	Y	C57BL/KsJ	C57BL/KsJ
	Kim, 2015	db/db C57BL/KsJ	N	Y	Y	N	N	Y	N	N	-	Y	N	I	-	Unknown	Unknown
	Wang, 2015	db/db C57BL/KsJ	N	Y	Y	N	N	Y	N	Y	M	Y	Y	II	Y	C57BL/KsJ	C57BL/KsJ
	Cheng, 2014	db/db C57BL/KsJ	N	Y	Y	N	N	Y	Y	Y	F	Y	Y	II	Y	C57BL/KsJ	C57BL/KsJ
	Somineni, 2014	db/db C57BL/KsJ	N	Y	Y	N	N	Y	Y	Y	M	Y	Y	II	P	C57BL/KsJ	C57BL/KsJ
	Anthony, 2013	db/db C57BL/KsJ	N	Y	Y	N	N	Y	Y	Y	M	Y	Y	II	Y	Unknown	Unknown
	Ly, 2014	db/db C57BL/KsJ	Y	Y	Y	N	N	N	Y	Y	M	Y	Y	II	Y	C57BL/KsJ	C57BL/KsJ
	Bruckbauer, 2013	db/db C57BL/KsJ	Y	Y	Y	N	N	Y	Y	Y	M	Y	Y	II	Y	C57BL/KsJ	C57BL/KsJ
	Tripp, 2012	db/db C57BL/KsJ	Y	Y	Y	N	N	N	N	Y	M	Y	Y	II	Y	C57BL/KsJ	C57BL/KsJ
	Li, 2012	db/db C57BL/KsJ	N	N	Y	N	N	N	Y	Y	M	Y	Y	II	N	Unknown	Unknown
	Caton, 2011	db/db C57BL/KsJ	N	Y	Y	N	N	N	N	Y	M	Y	Y	II	Y	Unknown	Unknown
	Akanksha, 2010	db/db C57BL/KsJ	N	N	Y	N	N	N	N	Y	M	Y	Y	II	Y	C57BL/KsJ	C57BL/KsJ
	Caton, 2010	db/db C57BL/KsJ	N	Y	Y	N	N	N	N	N	-	Y	Y	II	Y	Unknown	Unknown
	Maurya, 2008	db/db C57BL/KsJ	N	N	Y	N	N	N	N	N	-	Y	Y	II	Y	C57BL/KsJ	C57BL/KsJ
	Heishi, 2008	db/db C57BL/KsJ	N	N	Y	N	N	N	N	Y	M	Y	Y	II	Y	C57BL/KsJ	C57BL/KsJ
	Yoon, 2007	db/db C57BL/KsJ	N	Y	Y	N	N	Y	Y	Y	M	Y	Y	II	Y	C57BL/KsJ	C57BL/KsJ
	Heishi, 2006	db/db C57BL/KsJ	N	Y	Y	N	N	N	N	Y	M	Y	Y	II	Y	C57BL/KsJ	C57BL/KsJ
	Fujita, 2005	db/db C57BL/KsJ	Y	Y	Y	N	N	N	Y	Y	M	Y	Y	II	Y	C57BL/KsJ	C57BL/KsJ
	Fujita, 2002	db/db C57BL/KsJ	Y	Y	Y	N	N	N	N	Y	M	Y	Y	II	Y	C57BL/6J	C57BL/KsJ
	Ono, 2000	db/db C57BL/KsJ	Y	Y	N	N	N	N	N	Y	F	Y	Y	II	Y	C57BL/KsJ	C57BL/KsJ
	Raza, 2013	db/db C57BL/KsJ	N	N	N	N	N	N	Y	Y	M	Y	Y	II	Y	Unknown	Unknown
	Combs, 2002	db/db C57BL/KsJ	Y	Y	Y	N	N	N	N	Y	M	Y	Y	II	Y	C57BL/KFJ	C57BL/KFJ
	Lejnev, 2016	db/db C57BL/KsJ	N	Y	Y	N	N	N	N	Y	M	Y	Y	II	Y	C57BL/KsJ	C57BL/KsJ
	Choi, 2016, 507	db/db C57BL/KsJ	N	Y	Y	N	N	Y	Y	Y	M	Y	Y	II	Y	C57BL/KsJ	C57BL/KsJ
	Choi, 2016, 737	db/db C57BL/KsJ	Y	Y	Y	N	N	Y	Y	Y	M	Y	Y	II	Y	C57BL/KsJ	C57BL/KsJ
	Yuan, 2016	db/db C57BL/KsJ	N	Y	Y	N	N	N	N	Y	M	Y	Y	II	Y	Unknown	Unknown
	Feng, 2016	db/db C57BL/KsJ	N	N	Y	N	N	Y	N	Y	F	Y	Y	II	Y	Unknown	Unknown
	Park, 2016	db/db C57BL/KsJ	Y	Y	Y	N	N	Y	Y	Y	M	Y	Y	II	Y	C57BL/KsJ	C57BL/KsJ
	Wang, 2016	db/db C57BL/KsJ	N	Y	Y	N	N	Y	N	Y	M	Y	Y	II	Y	C57BL/KsJ	C57BL/KsJ
	Saito, 2015	db/db C57BL/KsJ	Y	Y	Y	N	Y	Y	N	Y	M	Y	N	I	-	C57BL/KsJ	C57BL/KsJ
	Park, 2015, 472	db/db C57BL/KsJ	Y	Y	Y	N	N	Y	Y	Y	M	Y	Y	II	Y	C57BL/KsJ	C57BL/KsJ
	Park, 2015, 1088	db/db C57BL/KsJ	Y	Y	Y	N	N	Y	Y	Y	M	Y	Y	II	Y	C57BL/KsJ	C57BL/KsJ
	Gim, 2015	db/db C57BL/KsJ	Y	Y	Y	N	N	Y	N	Y	M	Y	Y	II	Y	C57BL/KsJ	C57BL/KsJ
	Sharma, 2015	db/db C57BL/KsJ	N	Y	Y	N	N	N	Y	Y	M	Y	Y	II	Y	C57BL/KsJ	C57BL/KsJ
	Kotlinowski, 2014	db/db C57BL/KsJ	N	Y	Y	N	N	N	N	N	-	Y	Y	II	Y	C57BL/6J	C57BL/KsJ
	Hanf, 2014	db/db C57BL/KsJ	N	N	Y	N	N	Y	N	Y	M	Y	Y	II	Y	Unknown	Unknown
	Mishra, 2014	db/db C57BL/KsJ	N	Y	Y	N	N	Y	N	Y	M	Y	N	I	-	Unknown	Unknown
	Yang, 2013	db/db C57BL/KsJ	Y	Y	Y	N	N	N	N	Y	M	Y	N	I	-	C57BL/KsJ	C57BL/KsJ
	Ye, 2013	db/db C57BL/KsJ	N	Y	Y	N	N	N	N	Y	M	Y	Y	II	Y	Unknown	Unknown
	Chodavarapu, 2013	db/db C57BL/KsJ	Y	Y	Y	N	N	Y	N	Y	M	Y	Y	II	Y	C57BL/KsJ	C57BL/KsJ
	Zhou, 2013	db/db C57BL/KsJ	N	N	Y	N	N	N	N	Y	M	Y	Y	II	Y	C57BL/6J	C57BL/KsJ
	Wein, 2013	db/db C57BL/KsJ	Y	Y	Y	N	N	Y	Y	Y	F	Y	Y	II	Y	C57BL/KsJ	C57BL/KsJ
	Shi, 2013	db/db C57BL/KsJ	N	Y	Y	N	N	Y	Y	N	-	Y	Y	II	Y	C57BL/KsJ	C57BL/KsJ
	He, 2012	db/db C57BL/KsJ	N	Y	Y	N	N	Y	N	Y	M	Y	Y	II	Y	C57BL/KsJ	C57BL/KsJ
	Schrader, 2012	db/db C57BL/KsJ	N	Y	Y	N	N	Y	N	Y	F	Y	Y	II	Y	C57BL/KsJ	C57BL/KsJ
	Do, 2012	db/db C57BL/KsJ	N	N	Y	N	N	Y	N	Y	M	Y	Y	II	Y	C57BL/KsJ	C57BL/KsJ
	Park, 2013	db/db C57BL/KsJ	N	Y	Y	N	N	Y	Y	Y	M	Y	Y	II	Y	C57BL/KsJ	C57BL/KsJ
	Tan, 2012	db/db C57BL/KsJ	N	Y	Y	N	N	N	N	Y	M	Y	N	I	-	C57BL/KFJ	C57BL/KFJ
	Ortsaeter, 2012	db/db C57BL/KsJ	N	Y	Y	N	N	Y	N	N	-	Y	Y	II	Y	C57BL/KsJ	C57BL/KsJ
	Sharma, 2012	db/db C57BL/KsJ	Y	Y	Y	N	N	Y	N	Y	M	Y	Y	II	Y	C57BL/KsJ	C57BL/KsJ
	Lee, 2012, 575	db/db C57BL/KsJ	N	Y	Y	N	N	Y	Y	Y	M	Y	Y	II	Y	C57BL/KsJ	C57BL/KsJ
	Tang, 2012	db/db C57BL/KsJ	N	Y	Y	N	N	Y	Y	Y	M	Y	Y	II	Y	C57BL/KsJ	C57BL/KsJ
	Oishi, 2011	db/db C57BL/KsJ	N	Y	Y	N	N	N	N	Y	M	Y	N	I	-	C57BL/KsJ	C57BL/KsJ
	Keil, 2011	db/db C57BL/KsJ	Y	Y	Y	N	N	N	N	Y	F	Y	Y	II	Y	C57BL/KsJ	C57BL/KsJ
	le Bouter, 2010	db/db C57BL/KsJ	Y	Y	Y	N	N	Y	Y	Y	M	Y	Y	II	Y	C57BL/KsJ	C57BL/KsJ
	Yang, 2010	db/db C57BL/KsJ	N	Y	Y	N	N	N	N	Y	M	Y	Y	II	Y	C57BL/KsJ	C57BL/KsJ
	Seto, 2010	db/db C57BL/KsJ	N	N	Y	N	N	N	N	Y	M	Y	Y	II	Y	Unknown	Unknown
	Jung, 2009	db/db C57BL/KsJ	N	Y	Y	N	N	Y	Y	Y	M	Y	N	I	-	C57BL/KsJ	C57BL/KsJ
	Bak, 2010	db/db C57BL/KsJ	N	Y	N	N	N	Y	N	Y	M	Y	Y	II	Y	C57BL/KsJ	C57BL/KsJ
	Cheng, 2009	db/db C57BL/KsJ	Y	Y	Y	N	N	N	N	Y	M	Y	N	I	-	Unknown	Unknown
	Au, 2009	db/db C57BL/KsJ	Y	Y	Y	N	N	N	Y	Y	M	Y	Y	II	Y	C57BL/KsJ	C57BL/KsJ
	Yun, 2009	db/db C57BL/KsJ	Y	Y	Y	N	N	N	N	Y	M	Y	Y	II	Y	C57BL/KsJ	C57BL/KsJ
	Wu, 2009	db/db C57BL/KsJ	N	N	Y	N	N	N	N	N	-	Y	Y	II	Y	C57BL/KsJ	C57BL/KsJ
	Hui, 2009	db/db C57BL/KsJ	Y	Y	Y	N	N	N	N	Y	M	Y	N	I	-	C57BL/6J	C57BL/KsJ
	Park, 2009	db/db C57BL/KsJ	N	Y	Y	N	N	N	N	Y	M	Y	Y	II	Y	C57BL/6J	C57BL/KsJ
	Yeo, 2008	db/db C57BL/KsJ	Y	Y	Y	N	N	Y	Y	Y	M	Y	Y	II	Y	C57BL/KsJ	C57BL/KsJ
	Wilson, 2008	db/db C57BL/KsJ	N	Y	Y	N	N	N	N	N	-	Y	Y	II	Y	C57BL/KsJ	C57BL/KsJ
	Kim, 2008	db/db C57BL/KsJ	N	Y	Y	N	N	Y	Y	Y	M	Y	Y	II	P	C57BL/KsJ	C57BL/KsJ
	Chang, 2008	db/db C57BL/KsJ	Y	Y	Y	N	N	N	N	Y	M	Y	Y	II	Y	Unknown	Unknown
	Yeo, 2007	db/db C57BL/KsJ	Y	Y	Y	N	N	Y	Y	Y	M	Y	Y	II	Y	C57BL/KsJ	C57BL/KsJ
	How, 2008	db/db C57BL/KsJ	N	Y	Y	N	N	N	N	Y	B	Y	Y	II	Y	C57BL/KsJ	C57BL/KsJ
	Jung, 2008	db/db C57BL/KsJ	N	Y	Y	N	N	N	Y	Y	M	Y	Y	II	Y	C57BL/KsJ	C57BL/KsJ
	Yamanaka, 2007	db/db C57BL/KsJ	Y	Y	Y	N	N	N	N	Y	M	Y	Y	II	Y	C57BL/KsJ	C57BL/KsJ
	Koh, 2007	db/db C57BL/KsJ	Y	Y	Y	N	N	N	N	Y	M	Y	N	I	-	Unknown	Unknown
	Jung, 2007	db/db C57BL/KsJ	N	Y	Y	N	N	Y	Y	Y	M	Y	Y	II	Y	C57BL/KsJ	C57BL/KsJ
	Roy, 2007	db/db C57BL/KsJ	N	Y	Y	N	N	N	N	Y	B	Y	Y	II	Y	C57BL/KsJ	C57BL/KsJ
	Okamoto, 2007	db/db C57BL/KsJ	Y	Y	Y	N	N	N	Y	Y	M	Y	Y	II	Y	C57BL/KsJ	C57BL/KsJ
	Mittra, 2007	db/db C57BL/KsJ	N	Y	Y	N	N	N	Y	Y	B	Y	Y	II	Y	C57BL/KsJ	C57BL/KsJ
	Han, 2007	db/db C57BL/KsJ	N	N	N	N	N	N	N	Y	M	Y	Y	II	Y	Unknown	Unknown
	Wang, 2006	db/db C57BL/KsJ	Y	Y	Y	N	N	N	N	Y	M	Y	Y	II	Y	C57BL/KsJ	C57BL/KsJ
	Choo, 2006	db/db C57BL/KsJ	Y	Y	Y	N	N	N	N	N	-	Y	Y	II	Y	C57BL/KsJ	C57BL/KsJ
	Loffler, 2006	db/db C57BL/KsJ	N	Y	Y	N	N	N	Y	Y	M	Y	Y	II	Y	C57BL/KsJ	C57BL/KsJ
	Reifel-Miller, 2005	db/db C57BL/KsJ	N	N	N	N	N	N	Y	N	-	Y	Y	II	Y	Unknown	Unknown
	Chen, 2005	db/db C57BL/KsJ	N	Y	Y	N	Y	N	N	Y	F	Y	N	I	-	Unknown	Unknown
	Dropinski, 2005	db/db C57BL/KsJ	N	N	N	N	N	N	N	Y	M	Y	Y	II	Y	Unknown	Unknown
	Shi, 2005	db/db C57BL/KsJ	Y	Y	Y	N	N	N	N	Y	M	Y	Y	II	Y	C57BL/KsJ	C57BL/KsJ
	Li, 2005	db/db C57BL/KsJ	N	N	Y	N	N	N	Y	Y	M	Y	Y	II	Y	Unknown	Unknown
	Minoura, 2004	db/db C57BL/KsJ	N	N	Y	N	N	N	N	Y	F	Y	Y	II	Y	C57BL/KsJ	C57BL/KsJ
	Kast-Woelbern, 2004	db/db C57BL/KsJ	N	Y	Y	N	N	N	N	Y	M	Y	N	I	-	Unknown	Unknown
	Arlt, 2004	db/db C57BL/KsJ	N	Y	Y	N	N	N	Y	Y	M	Y	Y	II	Y	C57BL/KsJ	C57BL/KsJ
	Shen, 2004	db/db C57BL/KsJ	N	Y	Y	N	N	N	Y	Y	M	Y	Y	II	Y	Unknown	Unknown
	Bagi, 2004	db/db C57BL/KsJ	N	Y	Y	N	N	N	N	Y	M	Y	Y	II	N	C57BL/KsJ	C57BL/KsJ
	Desai, 2003	db/db C57BL/KsJ	N	Y	Y	N	N	N	N	Y	M	Y	Y	II	Y	Unknown	Unknown
	Misra, 2003	db/db C57BL/KsJ	N	N	Y	N	N	N	N	Y	M	Y	N	I	-	Unknown	Unknown
	Koyama, 2003	db/db C57BL/KsJ	N	N	Y	N	N	N	N	Y	M	Y	Y	II	Y	Unknown	Unknown
	Edwards, 2003	db/db C57BL/KsJ	N	N	Y	N	N	N	N	Y	M	Y	N	I	-	Unknown	Unknown
	Adams, 2003	db/db C57BL/KsJ	N	N	N	N	N	N	N	N	-	Y	Y	II	Y	Unknown	Unknown
	Vikramadithyan, 2003	db/db C57BL/KsJ	N	Y	Y	N	N	N	N	Y	M	Y	N	I	-	C57BL/KsJ	C57BL/KsJ
	Chakrabarti, 2002	db/db C57BL/KsJ	N	Y	Y	N	N	N	N	N	-	Y	Y	II	Y	C57BL/KsJ	C57BL/KsJ
	Hori, 2002	db/db C57BL/KsJ	Y	Y	Y	N	N	N	N	Y	M	Y	Y	II	Y	C57BL/KsJ	C57BL/KsJ
	Madhavan, 2002	db/db C57BL/KsJ	N	Y	Y	N	N	N	N	Y	M	Y	Y	II	Y	C57BL/KsJ	C57BL/KsJ
	Gerhold, 2002	db/db C57BL/KsJ	Y	Y	Y	N	N	N	N	Y	M	Y	Y	II	Y	C57BL/KFJ	C57BL/KFJ
	Etgen, 2002	db/db C57BL/KsJ	Y	Y	Y	N	N	Y	N	Y	M	Y	N	I	-	C57BL/KsJ	C57BL/KsJ
	Clapham, 2001	db/db C57BL/KsJ	Y	Y	N	N	N	Y	Y	Y	F	Y	Y	II	Y	C57BL/KsJ	C57BL/KsJ
	Moore, 2001	db/db C57BL/KsJ	Y	Y	Y	N	N	N	Y	Y	F	Y	Y	II	Y	C57BL/KsJ	C57BL/KsJ
	Lohray, 2001	db/db C57BL/KsJ	N	Y	Y	N	N	N	N	Y	M	Y	Y	II	Y	C57BL/KsJ	C57BL/KsJ
	Vikramadithyan, 2000	db/db C57BL/KsJ	N	Y	Y	N	N	N	Y	Y	M	Y	Y	II	Y	C57BL/KsJ	C57BL/KsJ
	Chaput, 2000	db/db C57BL/KsJ	Y	Y	Y	N	N	Y	Y	Y	M	Y	Y	II	Y	Unknown	Unknown
	Chakrabarti, 1999	db/db C57BL/KsJ	N	Y	Y	N	N	N	N	Y	M	Y	Y	II	Y	C57BL/KsJ	C57BL/KsJ
	Lohray, 1999	db/db C57BL/KsJ	N	Y	Y	N	N	N	Y	Y	M	Y	Y	II	Y	C57BL/KsJ	C57BL/KsJ
	Burris, 1999	db/db C57BL/KsJ	N	N	N	N	N	N	N	Y	F	Y	N	I	-	C57BL/KFJ	C57BL/KFJ
	Lohray, 1998	db/db C57BL/KsJ	N	Y	Y	N	N	N	Y	Y	M	Y	Y	II	Y	C57BL/KFJ	C57BL/KFJ
	Connor, 1997	db/db C57BL/KsJ	Y	Y	Y	N	N	N	Y	Y	F	Y	Y	II	Y	C57BL/KFJ	C57BL/KFJ
		db/db total	0.34375	0.7875	0.9375	0	0.0125	0.34375	0.3375	0.89375	0.846154
			160								0.125874
											0.027972
											143
		Studies total	0.350598	0.808765	0.928287	0	0.00796813	0.346614	0.390438	0.900398	0.871681	197			160	0.78125	0.78125
			251	251	251	251	251	251	251	251	226				251	35	35
			88	203	233	0	2	87	98	226	0.0884956					125	125
										25	0.039823
